# Supplementary material
Source: PubMed Central journal article supplement (PMC2676677)
Supplement: NIHMS80974-supplement-01.pdf [file NIHMS80974-supplement-01.pdf]

Type of file: figure

Label: S1 and S2

Filename: S1 and S2 PEA-15\_01-05-09.ppt

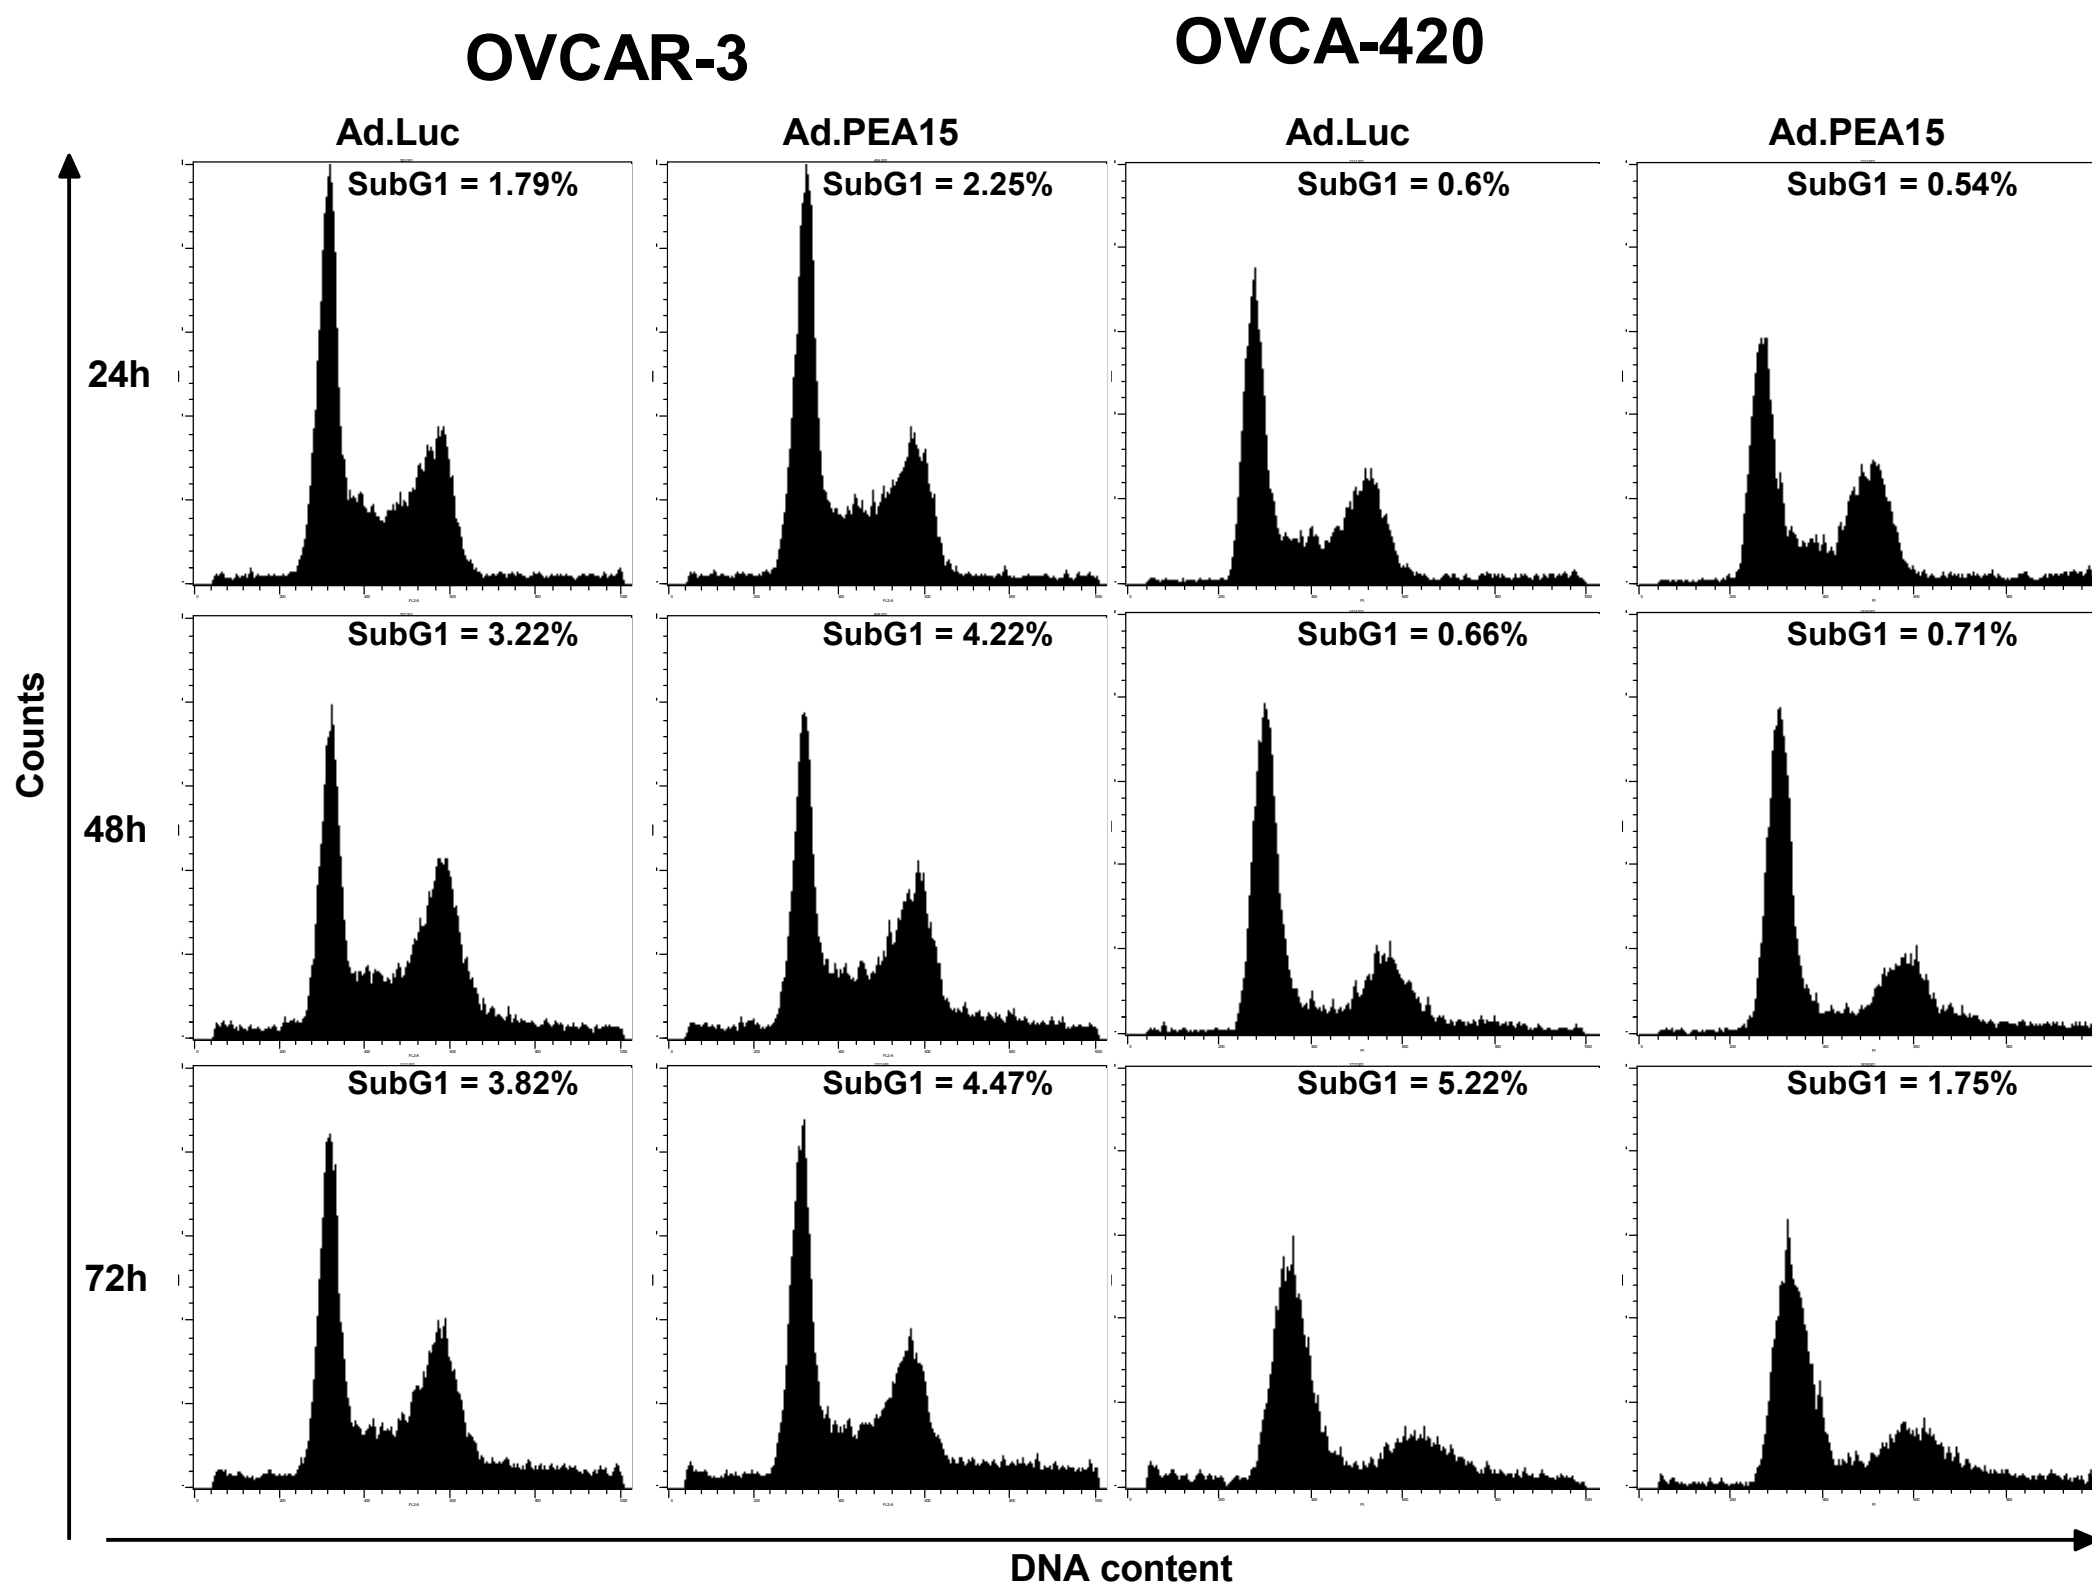

Fig. S1 PEA-15 does not induce apoptosis in OVCAR-3 and OVCA-420 cells. Ovarian cancer cells were treated with Ad.Luc or Ad.PEA-15 for 24, 48 and 72 h and then subjected to cell cycle analysis.

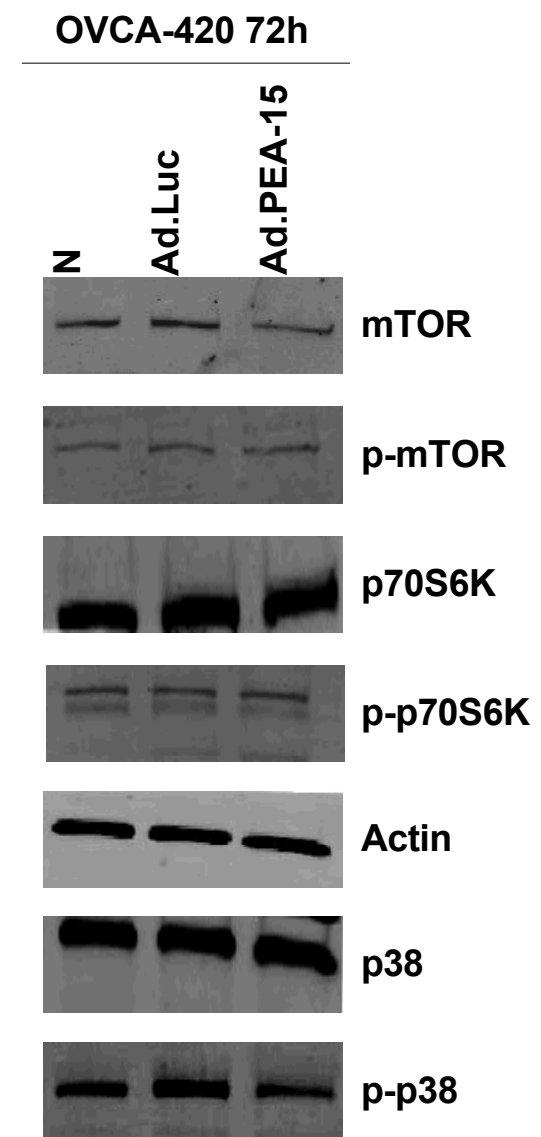

Fig. S2 OVCA-420 cells were untreated or infected with Ad.Luc or Ad.PEA-15 for 72 h and then subjected to western blot analysis.
